# Supplementary material
Source: PubMed Central journal article supplement (PMC3341015)
Supplement: 1115944109_sapp.pdf [file 1115944109_sapp.pdf]

S1. Map of the study subdistricts, with the normal depth of annual flooding from Yu et al. (2010).

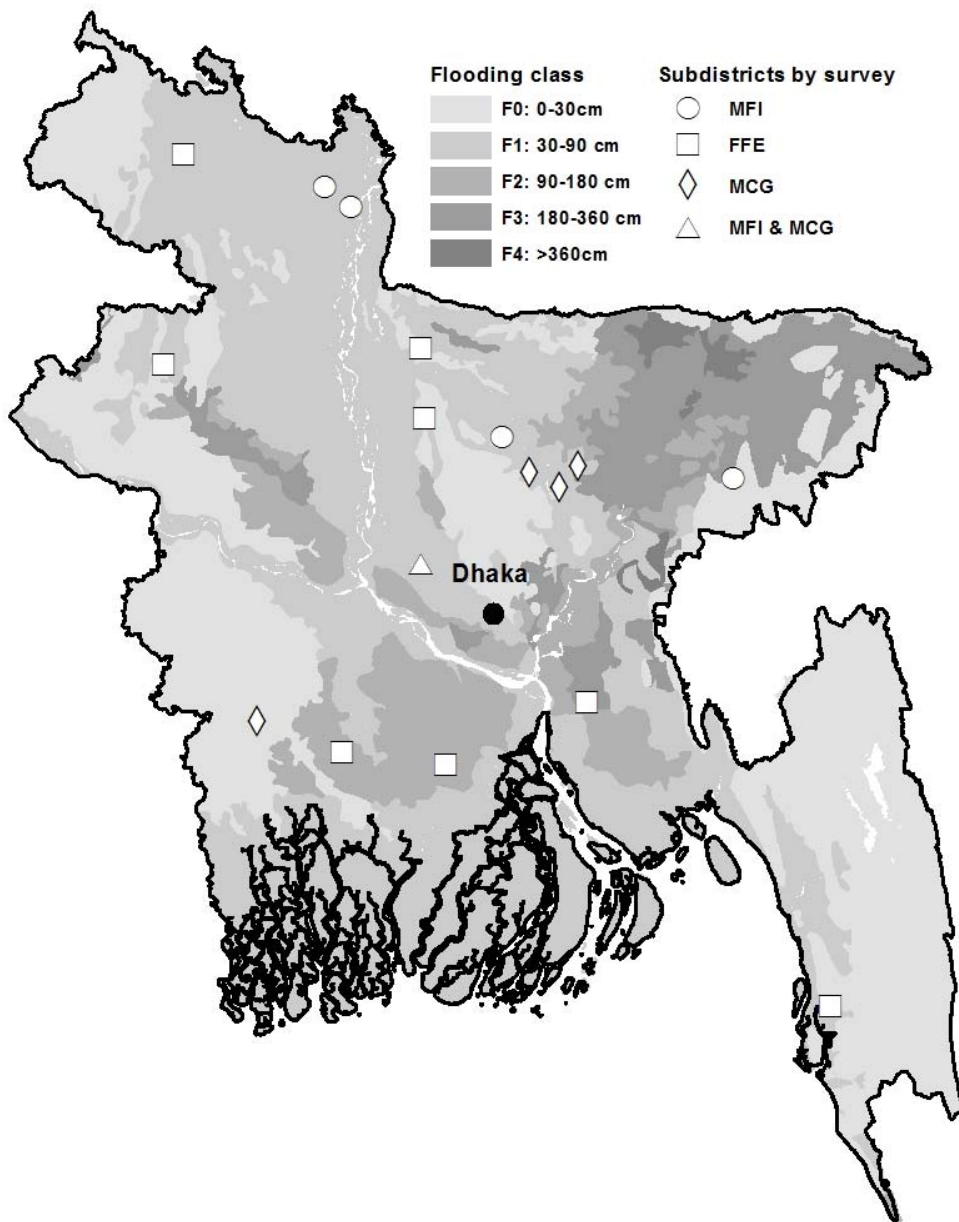

S2. Annual rates of migration under various environmental conditions.

| Type of move                  | Overall | Flooding exposure |       |       |         | Crop loss exposure |       |       |         | Number of moves |
|-------------------------------|---------|-------------------|-------|-------|---------|--------------------|-------|-------|---------|-----------------|
|                               |         | <5%               | 5-20% | >20%  | F-test  | <5%                | 5-20% | >20%  | F-test  |                 |
| All moves                     | 6.4%    | 6.0%              | 10.8% | 6.8%  | 17.2*** | 5.8%               | 7.1%  | 15.6% | 61.8*** | 2,070           |
| Within-district moves         | 3.8%    | 3.6%              | 6.5%  | 4.2%  | 12.5*** | 3.5%               | 4.3%  | 7.9%  | 18.8*** | 1,227           |
| Out-of-district moves         | 2.5%    | 2.4%              | 4.2%  | 2.6%  | 6.2**   | 2.2%               | 2.7%  | 7.6%  | 48.7*** | 808             |
| Person-years of exposure      | 32,229  | 26,572            | 2,036 | 3,621 |         | 24,106             | 6,916 | 1,207 |         |                 |
| Subdistrict-years of exposure | 193     | 154               | 22    | 17    |         | 143                | 39    | 11    |         |                 |

Note: Values are annual rates of migration for at-risk individuals, and exposure is measured by the annual proportion of households exposed in the subdistrict (see text). Data on the destination of moves are missing for 173 migrants. F-tests are for the independence of migration rates and environmental conditions, corrected for clustering at the level of the community.

S3. Annual rates of migration, flooding, and crop failure with the ratio of annual rainfall to median rainfall.

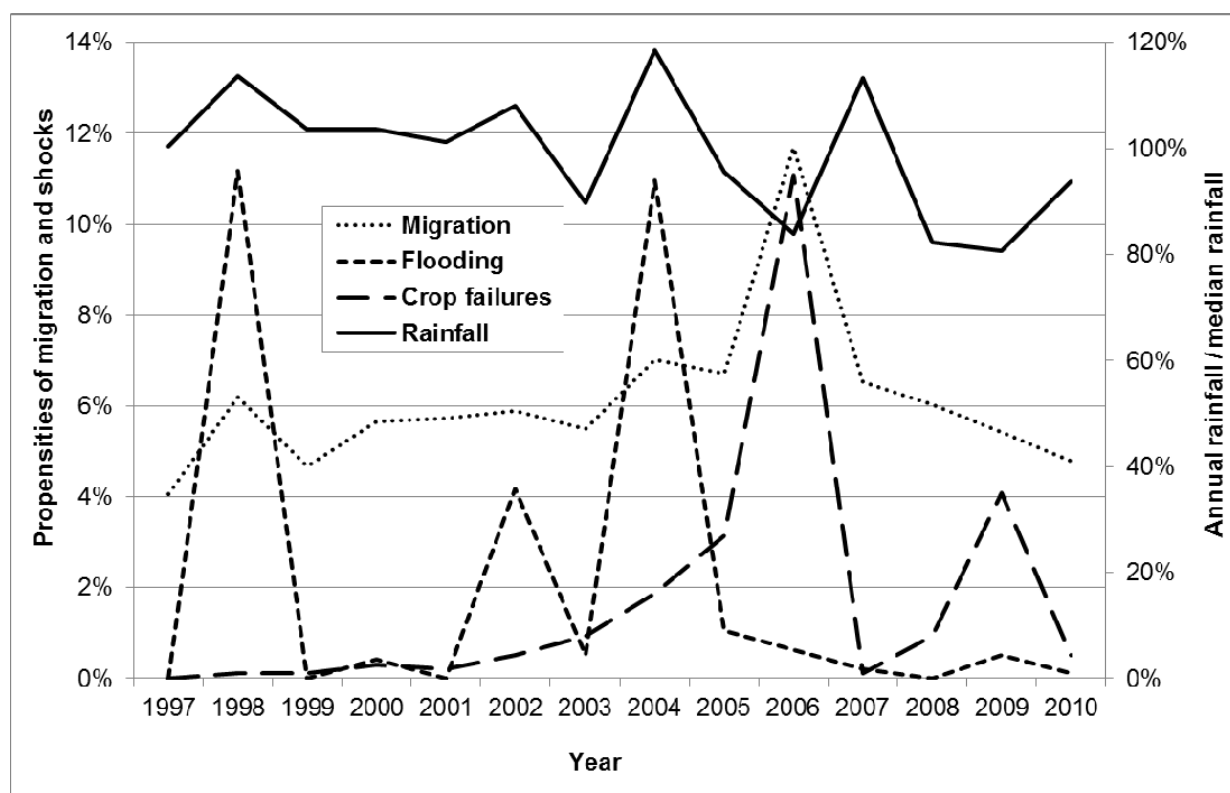

**S4.** Household-level tobit models of total income and various income sources in 2006, including coefficients and significance tests.

| Predictor                          | Total income | Agricultural income | Animal income | Fishing income | Forest income | Other income | Rural remittances | Urban remittances | International remittances | Government assistance | Pension income |
|------------------------------------|--------------|---------------------|---------------|----------------|---------------|--------------|-------------------|-------------------|---------------------------|-----------------------|----------------|
| Exposure to flooding (%)           | -0.016*      | -0.002              | -0.008        | -0.010         | -0.020**      | -0.127***    | -0.013*           | -0.074**          | -0.100                    | -0.013**              | -0.028         |
| Exposure to crop loss (%)          | -0.043***    | -0.049***           | -0.028*       | -0.203***      | -0.034*       | 0.067        | -0.020            | -0.067+           | -0.091                    | 0.009                 | -0.068+        |
| Exposure to livestock deaths (%)   | 0.117        | 0.071               | 0.044         | -0.214*        | -0.086        | 1.080**      | 0.101+            | -0.064            | -0.225                    | 0.051+                | 0.183+         |
| Exposure to health shocks (%)      | 0.013        | -0.011              | -0.013        | -0.103+        | -0.002        | 0.201**      | -0.012            | 0.038             | 0.238+                    | 0.008                 | -0.053         |
| Household size (#)                 | 0.139***     | 0.094***            | 0.115***      | 0.109***       | 0.067**       | 0.234***     | 0.104***          | 0.172**           | 0.415**                   | -0.002                | 0.139*         |
| Proportion of minors (%)           | -0.004*      | -0.001              | 0.001         | 0.002          | 0.004         | -0.015*      | -0.006**          | -0.015*           | -0.031+                   | -0.001                | -0.020**       |
| Head is female (1/0)               | 0.037        | -0.511*             | -0.201        | -0.454+        | 0.123         | 0.189        | 0.312*            | 0.294             | 1.182                     | 0.138                 | 2.144***       |
| Head is non-Muslim (1/0)           | -0.284       | -0.122              | -0.364+       | -0.003         | -0.271        | 0.415        | -0.497+           | -0.798            | -6.281**                  | 0.360***              | -0.116         |
| Head has primary education (1/0)   | 0.010        | -0.109              | -0.081        | 0.239+         | -0.013        | -0.309       | -0.059            | 0.069             | 0.186                     | -0.002                | -0.056         |
| Head has secondary education (1/0) | 0.162+       | 0.036               | -0.168+       | 0.327*         | 0.164         | -0.097       | -0.279+           | 1.170***          | 0.639                     | -0.338***             | 2.077***       |
| Ln(expenditures per capita) (Taka) | 0.570***     | 0.444***            | 0.369***      | 0.469***       | 0.451***      | 0.715*       | -0.025            | -0.011            | 2.039**                   | -0.257***             | -0.274         |
| Ln(land area+1) (ha)               | 0.236***     | 0.408***            | 0.061*        | 0.288***       | 0.098*        | -0.064       | 0.053             | 0.117             | 0.382                     | -0.137***             | -0.236*        |
| Land with irrigation (1/0)         | 0.140*       | 0.320***            | 0.052         | 0.108          | -0.067        | 0.012        | -0.107            | -0.193            | 0.387                     | -0.013                | -0.220         |
| Constant                           | -2.697***    | -2.998***           | -2.357**      | -2.493         | -3.966***     | -14.860***   | -0.915            | -2.971            | -26.731***                | 1.451*                | -2.195         |
| Sigma                              | 1.131***     | 1.249***            | 1.210***      | 1.469***       | 1.493***      | 3.764***     | 1.282***          | 3.197***          | 6.147***                  | 0.706***              | 3.377***       |
| N <sub>households</sub>            | 1615         | 1615                | 1615          | 1615           | 1615          | 1615         | 1615              | 1615              | 1615                      | 1615                  | 1615           |
| Zero values                        | 10           | 266                 | 368           | 1125           | 1112          | 1181         | 1054              | 1277              | 1487                      | 1171                  | 1474           |
| Mean value (Taka)                  | 46870        | 15725               | 4795          | 1538           | 1033          | 10698        | 1013              | 3269              | 6391                      | 223                   | 2185           |

All outcomes have been transformed as  $\ln(\text{Taka}/1000+1)$ .

Exposure to shocks is measured by the proportion of households exposed in the subdistrict in 2005. All other predictors are measured at baseline.

S5. Predictors used in the event history analysis.

| Predictor                                                  | Unit | Time-varying? | Person-year mean | Standard deviation |
|------------------------------------------------------------|------|---------------|------------------|--------------------|
| <b>Individual controls</b>                                 |      |               |                  |                    |
| Female                                                     | 1/0  | No            | 0.36             | 0.48               |
| Age 15-16                                                  | 1/0  | Reference     | 0.17             | 0.38               |
| Age 17-19                                                  | 1/0  | Yes           | 0.22             | 0.42               |
| Age 20-24                                                  | 1/0  | Yes           | 0.26             | 0.44               |
| Age 25-29                                                  | 1/0  | Yes           | 0.17             | 0.38               |
| Age 30-39                                                  | 1/0  | Yes           | 0.17             | 0.38               |
| Child of head                                              | 1/0  | No            | 0.76             | 0.43               |
| Less than primary education                                | 1/0  | Reference     | 0.36             | 0.48               |
| Primary education                                          | 1/0  | No            | 0.31             | 0.46               |
| Secondary education                                        | 1/0  | No            | 0.32             | 0.47               |
| Has a child                                                | 1/0  | Yes           | 0.21             | 0.41               |
| <b>Household controls</b>                                  |      |               |                  |                    |
| Household size                                             | #    | No            | 7.18             | 2.96               |
| Proportion of minors                                       | %    | No            | 34.04            | 18.28              |
| Head is female                                             | 1/0  | No            | 0.05             | 0.22               |
| Head is non-Muslim                                         | 1/0  | No            | 0.07             | 0.25               |
| Head without primary education                             | 1/0  | Reference     | 0.62             | 0.48               |
| Head has primary education                                 | 1/0  | No            | 0.18             | 0.39               |
| Head has secondary education                               | 1/0  | No            | 0.19             | 0.39               |
| Ln(expenditures per capita)                                | Tk   | No            | 6.82             | 0.46               |
| Ln(land area+1)                                            | ha   | No            | 3.86             | 1.52               |
| Land with irrigation                                       | 1/0  | No            | 0.42             | 0.49               |
| <b>Village and subdistrict controls</b>                    |      |               |                  |                    |
| Rich community                                             | 1/0  | No            | 0.19             | 0.39               |
| Intermediate community                                     | 1/0  | Reference     | 0.56             | 0.50               |
| Poor community                                             | 1/0  | No            | 0.25             | 0.43               |
| Jute-producing community                                   | 1/0  | No            | 0.78             | 0.42               |
| Community has a road                                       | 1/0  | Yes           | 0.93             | 0.26               |
| Community has a school                                     | 1/0  | Yes           | 0.70             | 0.46               |
| Subdistrict propensity of local moves <sup>1</sup>         | %    | Yes           | 3.40             | 2.38               |
| Subdistrict propensity of long-distance moves <sup>1</sup> | %    | Yes           | 2.92             | 2.64               |
| <b>Shocks<sup>2</sup></b>                                  |      |               |                  |                    |
| Flood exposure: in household                               | 1/0  | Yes           | 0.06             | 0.23               |
| Percent exposed in subdistrict                             | %    | Yes           | 4.73             | 10.02              |
| 5-20% exposed in subdistrict                               | 1/0  | Yes           | 0.06             | 0.24               |
| >20% exposed in subdistrict                                | 1/0  | Yes           | 0.11             | 0.32               |
| Household losses                                           | '000 | Yes           | 0.15             | 0.64               |
| Subdistrict mean losses                                    | taka | Yes           | 0.33             | 0.62               |
| Crop loss: in household                                    | 1/0  | Yes           | 0.05             | 0.21               |
| Percent exposed in subdistrict                             | %    | Yes           | 3.76             | 5.94               |
| 5-20% exposed in subdistrict                               | 1/0  | Yes           | 0.21             | 0.41               |
| >20% exposed in subdistrict                                | 1/0  | Yes           | 0.04             | 0.19               |
| Household losses                                           | '000 | Yes           | 0.11             | 0.51               |
| Subdistrict mean losses                                    | taka | Yes           | 0.28             | 0.35               |
| Livestock death: in household                              | 1/0  | Yes           | 0.06             | 0.23               |
| Percent exposed in subdistrict                             | %    | Yes           | 4.81             | 4.89               |
| 5-20% exposed in subdistrict                               | 1/0  | Yes           | 0.38             | 0.48               |
| >20% exposed in subdistrict                                | 1/0  | Yes           | 0.01             | 0.09               |
| Household losses                                           | '000 | Yes           | 0.12             | 0.55               |
| Subdistrict mean losses                                    | taka | Yes           | 0.37             | 0.37               |
| Health shock: in household                                 | 1/0  | Yes           | 0.15             | 0.36               |
| Percent exposed in subdistrict                             | %    | Yes           | 12.29            | 9.74               |
| 5-20% exposed in subdistrict                               | 1/0  | Yes           | 0.57             | 0.49               |
| >20% exposed in subdistrict                                | 1/0  | Yes           | 0.20             | 0.40               |
| Household losses                                           | '000 | Yes           | 0.33             | 0.95               |
| Subdistrict mean losses                                    | taka | Yes           | 1.04             | 0.63               |

<sup>1</sup> Defined as the proportion of the subdistrict population who became movers of this type in the year  $t-1$ .

<sup>2</sup> The reference category for the subdistrict-level shock categories is <5% exposed. Economic losses have been transformed by  $\ln(x+1)$ .

S6. Full results of Specifications A-C, including odds ratios and significance tests.

| Predictor                                | Specification A |             |                 | Specification B |             |                 | Specification C |             |                 |
|------------------------------------------|-----------------|-------------|-----------------|-----------------|-------------|-----------------|-----------------|-------------|-----------------|
|                                          | Logit           | Multinomial |                 | Logit           | Multinomial |                 | Logit           | Multinomial |                 |
|                                          |                 | In district | Out of district |                 | In district | Out of district |                 | In district | Out of district |
| <b>Individual-level controls</b>         |                 |             |                 |                 |             |                 |                 |             |                 |
| Female                                   | 2.99***         | 6.42***     | 1.01            | 2.98***         | 6.41***     | 1.00            | 2.98***         | 6.41***     | 1.00            |
| Age 17-19                                | 1.63***         | 1.52***     | 1.98***         | 1.63***         | 1.52***     | 1.98***         | 1.62***         | 1.52***     | 1.96***         |
| Age 20-24                                | 1.82***         | 1.61***     | 2.37***         | 1.83***         | 1.61***     | 2.38***         | 1.81***         | 1.60***     | 2.36***         |
| Age 25-29                                | 1.70***         | 1.17        | 2.81***         | 1.70***         | 1.17        | 2.84***         | 1.70***         | 1.17        | 2.83***         |
| Age 30-39                                | 1.42*           | 1.08        | 2.05***         | 1.44**          | 1.08        | 2.08***         | 1.43**          | 1.08        | 2.07***         |
| Child of head                            | 1.26**          | 1.21+       | 1.23+           | 1.26**          | 1.21+       | 1.24+           | 1.26**          | 1.22+       | 1.24+           |
| Primary education                        | 0.67***         | 0.55***     | 0.94            | 0.67***         | 0.55***     | 0.94            | 0.67***         | 0.55***     | 0.94            |
| Secondary education                      | 0.56***         | 0.39***     | 0.94            | 0.56***         | 0.39***     | 0.93            | 0.56***         | 0.39***     | 0.94            |
| Has a child                              | 0.24***         | 0.18***     | 0.36***         | 0.24***         | 0.18***     | 0.36***         | 0.24***         | 0.18***     | 0.36***         |
| <b>Household-level controls</b>          |                 |             |                 |                 |             |                 |                 |             |                 |
| Household size                           | 0.99            | 1.00        | 0.97+           | 0.99            | 1.00        | 0.97+           | 0.99            | 1.00        | 0.97+           |
| Proportion of minors                     | 1.01***         | 1.01**      | 1.01+           | 1.01***         | 1.01**      | 1.01*           | 1.01***         | 1.01**      | 1.01*           |
| Head is female                           | 0.97            | 0.82        | 1.25            | 0.97            | 0.82        | 1.26            | 0.98            | 0.82        | 1.26            |
| Head is non-Muslim                       | 0.76*           | 0.60*       | 1.05            | 0.75*           | 0.60*       | 1.05            | 0.75*           | 0.59*       | 1.04            |
| Head has primary education               | 1.13            | 1.10        | 1.13            | 1.12            | 1.10        | 1.11            | 1.12            | 1.09        | 1.11            |
| Head has secondary education             | 1.24**          | 1.19+       | 1.28*           | 1.24**          | 1.18        | 1.26*           | 1.24**          | 1.19+       | 1.26*           |
| Ln(expenditures per capita)              | 1.17*           | 1.16        | 1.17+           | 1.17*           | 1.17+       | 1.18+           | 1.18*           | 1.17+       | 1.18+           |
| Ln(land area+1)                          | 0.98            | 1.03        | 0.89**          | 0.98            | 1.04        | 0.90**          | 0.98            | 1.04        | 0.90**          |
| Land with irrigation                     | 0.97            | 0.92        | 1.05            | 0.97            | 0.92        | 1.05            | 0.97            | 0.93        | 1.05            |
| <b>Village and thana-level controls</b>  |                 |             |                 |                 |             |                 |                 |             |                 |
| Rich community                           | 1.30**          | 1.56**      | 1.02            | 1.29**          | 1.54**      | 1.01            | 1.29**          | 1.53**      | 1.01            |
| Poor community                           | 1.05            | 1.00        | 1.11            | 1.05            | 1.00        | 1.11            | 1.04            | 1.00        | 1.11            |
| Jute-producing community                 | 0.85*           | 0.82*       | 0.84            | 0.85*           | 0.82*       | 0.83+           | 0.84*           | 0.81*       | 0.83+           |
| Community has a road                     | 0.80            | 0.97        | 0.63*           | 0.81            | 0.97        | 0.63*           | 0.77*           | 0.90        | 0.62**          |
| Community has a school                   | 0.94            | 0.81**      | 1.16            | 0.95            | 0.82**      | 1.18            | 0.94            | 0.82**      | 1.17            |
| Subdist. propensity of local moves       | 0.98            | 0.98        | 0.99            | 0.98            | 0.98        | 0.99            | 0.99            | 0.99        | 1.00            |
| Subdist. propensity of out-migration     | 1.00            | 1.00        | 0.99            | 1.00            | 1.00        | 0.99            | 1.02            | 1.03        | 1.00            |
| <b>Shocks</b>                            |                 |             |                 |                 |             |                 |                 |             |                 |
| Flood exposure: in household             |                 |             |                 | 1.08            | 0.93        | 1.31+           |                 |             |                 |
| Percent exposed in thana                 | 1.00            | 1.00        | 0.99            | 1.00            | 1.00        | 0.99            |                 |             |                 |
| Household losses                         |                 |             |                 |                 |             |                 | 1.04            | 0.99        | 1.09+           |
| Subdistrict mean losses                  |                 |             |                 |                 |             |                 | 1.01            | 1.12+       | 0.94            |
| Crop loss: in household                  |                 |             |                 | 0.62***         | 0.67*       | 0.53***         |                 |             |                 |
| Percent exposed in thana                 | 1.04***         | 1.04***     | 1.03**          | 1.04***         | 1.04***     | 1.04***         |                 |             |                 |
| Household losses                         |                 |             |                 |                 |             |                 | 0.84**          | 0.90        | 0.73***         |
| Subdistrict mean losses                  |                 |             |                 |                 |             |                 | 1.49**          | 1.67***     | 1.39            |
| Livestock death: in household            |                 |             |                 | 0.99            | 1.02        | 0.97            |                 |             |                 |
| Percent exposed in thana                 | 0.98            | 0.97+       | 0.99            | 0.98            | 0.97+       | 0.99            |                 |             |                 |
| Household losses                         |                 |             |                 |                 |             |                 | 0.99            | 0.98        | 1.02            |
| Subdistrict mean losses                  |                 |             |                 |                 |             |                 | 0.76            | 0.71        | 0.82            |
| Health shock: in household               |                 |             |                 | 0.87*           | 0.93        | 0.79*           |                 |             |                 |
| Percent exposed in thana                 | 1.01*           | 1.03***     | 1.00            | 1.02*           | 1.03***     | 1.00            |                 |             |                 |
| Household losses                         |                 |             |                 |                 |             |                 | 0.97            | 0.98        | 0.96            |
| Subdistrict mean losses                  |                 |             |                 |                 |             |                 | 1.05            | 1.20+       | 0.95            |
| <b>Joint tests (<math>\chi^2</math>)</b> |                 |             |                 |                 |             |                 |                 |             |                 |
| Flooding                                 | 0               | 0           | 1               | 1               | 1           | 4               | 1               | 3           | 3               |
| Crop losses                              | 27***           | 18***       | 7**             | 55***           | 25***       | 28***           | 17***           | 14***       | 13**            |
| Year indicators                          | 86***           | 51***       | 40***           | 87***           | 51***       | 40***           | 100***          | 60***       | 63***           |
| Thana indicators                         | 120***          | 92***       | 149***          | 117***          | 91***       | 146***          | 90***           | 67***       | 136***          |

Model also includes indicators for thana and year, not shown.

+ p<0.10, \* p<0.05, \*\* p<0.01, \*\*\* p<0.001

S7. Full results of Specification D, including odds ratios and significance tests.

| Predictor                                | Logit   | Multinomial |                 | Logit by subpopulation |         |         |            |          |
|------------------------------------------|---------|-------------|-----------------|------------------------|---------|---------|------------|----------|
|                                          |         | In district | Out of district | Men                    | Women   | Low PCE | Medium PCE | High PCE |
| <b>Individual-level controls</b>         |         |             |                 |                        |         |         |            |          |
| Female                                   | 2.98*** | 6.40***     | 1.00            | -                      | -       | 3.93*** | 3.50***    | 2.19***  |
| Age 17-19                                | 1.63*** | 1.54***     | 1.98***         | 1.61***                | 1.83*** | 1.73*** | 1.65***    | 1.66***  |
| Age 20-24                                | 1.83*** | 1.62***     | 2.39***         | 1.91***                | 2.20*** | 1.95*** | 1.92***    | 1.92***  |
| Age 25-29                                | 1.70*** | 1.18        | 2.86***         | 2.04***                | 1.72**  | 1.87**  | 1.79***    | 1.67***  |
| Age 30-39                                | 1.43*   | 1.07        | 2.09***         | 1.91***                | 0.83    | 1.18    | 1.22       | 1.72**   |
| Child of head                            | 1.26**  | 1.22+       | 1.24+           | 0.48***                | 2.18*** | 1.25    | 1.63**     | 1.03     |
| Primary education                        | 0.67*** | 0.54***     | 0.94            | 0.77*                  | 0.59*** | 0.60*** | 0.68**     | 0.66***  |
| Secondary education                      | 0.56*** | 0.39***     | 0.94            | 0.84                   | 0.36*** | 0.54**  | 0.53***    | 0.58***  |
| Has a child                              | 0.24*** | 0.18***     | 0.36***         | 0.40***                | 0.20*** | 0.20*** | 0.23***    | 0.30***  |
| <b>Household-level controls</b>          |         |             |                 |                        |         |         |            |          |
| Household size                           | 0.99    | 1.00        | 0.97+           | 1.01                   | 0.99    | 0.98    | 0.99       | 0.99     |
| Proportion of minors                     | 1.01*** | 1.01**      | 1.01+           | 1.01*                  | 1.01**  | 1.01*   | 1.01*      | 1.00+    |
| Head is female                           | 0.98    | 0.83        | 1.25            | 0.85                   | 1.19    | 0.83    | 0.94       | 1.23     |
| Head is non-Muslim                       | 0.75*   | 0.59*       | 1.03            | 0.63*                  | 0.75*   | 0.44*   | 0.99       | 0.87     |
| Head has primary education               | 1.12    | 1.10        | 1.11            | 1.07                   | 1.09    | 1.22    | 0.98       | 1.16     |
| Head has secondary education             | 1.24**  | 1.20+       | 1.26*           | 1.15                   | 1.15    | 1.06    | 1.32+      | 1.24*    |
| Ln(expenditures per capita)              | 1.17*   | 1.16+       | 1.18+           | 1.33**                 | 1.05    | 0.94    | 1.79+      | 1.01     |
| Ln(land area+1)                          | 0.98    | 1.04        | 0.90**          | 0.93*                  | 1.03    | 1.00    | 1.03       | 0.97     |
| Land with irrigation                     | 0.97    | 0.93        | 1.05            | 0.98                   | 0.94    | 0.87    | 1.01       | 1.09     |
| <b>Village and thana-level controls</b>  |         |             |                 |                        |         |         |            |          |
| Rich community                           | 1.29**  | 1.54**      | 1.01            | 1.19                   | 1.24    | 0.99    | 1.70***    | 1.34     |
| Poor community                           | 1.05    | 1.00        | 1.12            | 1.09                   | 1.06    | 1.31*   | 0.87       | 1.22     |
| Jute-producing community                 | 0.84*   | 0.81*       | 0.83+           | 0.80*                  | 0.90    | 0.77    | 0.94       | 0.81+    |
| Community has a road                     | 0.79+   | 0.92        | 0.65*           | 0.64*                  | 0.95    | 0.61**  | 0.79       | 0.93     |
| Community has a school                   | 0.95    | 0.82**      | 1.18            | 0.93                   | 0.97    | 0.99    | 0.76**     | 0.98     |
| Thana propensity of local moves          | 0.98+   | 0.98        | 0.99            | 0.98                   | 0.98    | 0.98    | 0.95*      | 1.02     |
| Thana propensity of out-migration        | 1.00    | 1.01        | 1.00            | 1.03                   | 0.97    | 0.98    | 1.02       | 0.98     |
| <b>Shocks</b>                            |         |             |                 |                        |         |         |            |          |
| Flood exposure: in household             | 1.08    | 0.93        | 1.29            | 0.99                   | 1.11    | 0.86    | 0.97       | 1.30     |
| 5-20% exposed in thana                   | 1.08    | 1.57***     | 0.72+           | 0.89                   | 1.36*   | 1.59*   | 0.94       | 1.04     |
| >20% exposed in thana                    | 0.93    | 1.12        | 0.73            | 0.91                   | 0.99    | 0.90    | 0.91       | 1.04     |
| Crop loss: in household                  | 0.64*** | 0.69*       | 0.54***         | 0.63**                 | 0.68*   | 0.55*   | 0.79       | 0.52**   |
| 5-20% exposed in thana                   | 1.19+   | 1.45**      | 0.96            | 1.13                   | 1.31*   | 1.32+   | 1.25       | 1.04     |
| >20% exposed in thana                    | 2.38*** | 2.97***     | 1.82**          | 1.91***                | 2.78*** | 2.42**  | 2.36**     | 2.53***  |
| Livestock death: in household            | 0.96    | 0.99        | 0.95            | 0.91                   | 1.05    | 1.00    | 0.94       | 0.90     |
| 5-20% exposed in thana                   | 1.12    | 1.12        | 1.08            | 1.02                   | 1.22+   | 1.33*   | 1.09       | 0.98     |
| >20% exposed in thana                    | 1.51    | 1.27        | 2.18            | 2.35*                  | 1.10    | 0.88    | 2.69+      | 0.88     |
| Health shock: in household               | 0.87+   | 0.95        | 0.79*           | 0.79*                  | 1.00    | 0.65*** | 0.98       | 0.96     |
| 5-20% exposed in thana                   | 1.15    | 1.02        | 1.39+           | 1.33                   | 1.02    | 1.19    | 0.97       | 1.10     |
| >20% exposed in thana                    | 1.49+   | 1.63+       | 1.21            | 1.55                   | 1.41    | 1.59    | 1.13       | 1.52     |
| <b>Joint tests (<math>\chi^2</math>)</b> |         |             |                 |                        |         |         |            |          |
| Flooding                                 | 2       | 12**        | 7+              | 1                      | 6       | 8*      | 0          | 3        |
| Crop losses                              | 50***   | 28***       | 28***           | 23***                  | 19***   | 14**    | 8*         | 24***    |
| Year indicators                          | 106***  | 62***       | 60***           | 43***                  | 69***   | 53***   | 953***     | 73***    |
| Thana indicators                         | 120***  | 118***      | 151***          | 108***                 | 92***   | 49***   | 91***      | 50***    |

Model also includes indicators for thana and year, not shown.

PCE = per capita expenditure

+ p<0.10, \* p<0.05, \*\* p<0.01, \*\*\* p<0.001

**S8. Main results of Specifications E-H, including odds ratios, significance tests, and IV coefficients.**

| Exposure to natural disasters                                     | Logit        |  | Multinomial |                 | Descriptive values |       |
|-------------------------------------------------------------------|--------------|--|-------------|-----------------|--------------------|-------|
|                                                                   | All mobility |  | In district | Out of district | Mean               | SD    |
| <b>E. Subdistrict X household interactions<sup>1</sup></b>        |              |  |             |                 |                    |       |
| Flooding: subdistrict low X household yes                         | 0.83         |  | 0.31 *      | 1.55            | 0.01               | 0.08  |
| Subdistrict moderate X household no                               | 1.07         |  | 1.56 **     | 0.72 +          | 0.06               | 0.23  |
| Subdistrict moderate X household yes                              | 1.15         |  | 1.38        | 0.93            | 0.01               | 0.08  |
| Subdistrict severe X household no                                 | 0.90         |  | 1.02        | 0.75            | 0.07               | 0.25  |
| Subdistrict severe X household yes                                | 1.03         |  | 1.15        | 0.91            | 0.04               | 0.20  |
| Crop failure: subdistrict low X household yes                     | 0.71 +       |  | 0.74        | 0.55            | 0.01               | 0.09  |
| Subdistrict moderate X household no                               | 1.19 +       |  | 1.46 **     | 0.95            | 0.19               | 0.39  |
| Subdistrict moderate X household yes                              | 0.75         |  | 0.97        | 0.55 +          | 0.03               | 0.16  |
| Subdistrict severe X household no                                 | 2.39 ***     |  | 2.96 ***    | 1.84 **         | 0.03               | 0.16  |
| Subdistrict severe X household yes                                | 1.53         |  | 2.11 *      | 0.96            | 0.01               | 0.10  |
| <b>F. Multiple temporal lags</b>                                  |              |  |             |                 |                    |       |
| Flooding: Household exposed in year t                             | 1.26         |  | 1.11        | 1.50 +          | 0.03               | 0.16  |
| Household exposed in year t-1                                     | 0.92         |  | 0.81        | 1.10            | 0.03               | 0.17  |
| Percent exposed in subdistrict in year t                          | 1.00         |  | 1.00        | 0.99            | 2.33               | 7.19  |
| Percent exposed in subdistrict in year t-1                        | 1.00         |  | 1.01 +      | 0.99            | 2.41               | 7.30  |
| Crop failure: Household exposed in year t                         | 0.67 *       |  | 0.84        | 0.42 ***        | 0.02               | 0.16  |
| Household exposed in year t-1                                     | 0.57 **      |  | 0.48 **     | 0.66            | 0.02               | 0.15  |
| Percent exposed in subdistrict in year t                          | 1.03 ***     |  | 1.03 **     | 1.03 *          | 1.97               | 3.92  |
| Percent exposed in subdistrict in year t-1                        | 1.05 ***     |  | 1.05 ***    | 1.04 **         | 1.83               | 3.73  |
| <b>G. Stratified by baseline survey</b>                           |              |  |             |                 |                    |       |
| Survey 1 (n = 5,855)                                              |              |  |             |                 |                    |       |
| Flooding: Household exposed                                       | 0.95         |  | 0.86        | 1.14            | 0.06               | 0.23  |
| Percent exposed in subdistrict                                    | 0.99 *       |  | 0.99        | 0.97 **         | 4.31               | 10.84 |
| Crop failure: Household exposed                                   | 1.04         |  | 1.09        | 0.91            | 0.05               | 0.22  |
| Percent exposed in subdistrict                                    | 1.02         |  | 1.07 ***    | 0.94            | 2.54               | 4.29  |
| Survey 2 (n = 21,857)                                             |              |  |             |                 |                    |       |
| Flooding: Household exposed                                       | 1.32 *       |  | 1.16        | 1.46 *          | 0.05               | 0.22  |
| Percent exposed in subdistrict                                    | 1.00         |  | 1.00        | 1.00            | 4.36               | 9.44  |
| Crop failure: Household exposed                                   | 0.52 ***     |  | 0.51 *      | 0.52 **         | 0.04               | 0.19  |
| Percent exposed in subdistrict                                    | 1.02 +       |  | 1.03        | 1.02            | 3.50               | 5.46  |
| Survey 3 (n = 4,517)                                              |              |  |             |                 |                    |       |
| Flooding: Household exposed                                       | 0.83         |  | 0.68        | 1.25            | 0.08               | 0.28  |
| Percent exposed in subdistrict                                    | 0.99         |  | 0.99        | 0.99            | 7.06               | 11.25 |
| Crop failure: Household exposed                                   | 0.64 +       |  | 0.86        | 0.38 *          | 0.09               | 0.28  |
| Percent exposed in subdistrict                                    | 1.03 *       |  | 1.01        | 1.05 *          | 6.61               | 8.58  |
| <b>H. IV model: Cost-based measures of exposure<sup>2,3</sup></b> |              |  |             |                 |                    |       |
| Endogenous variables                                              |              |  |             |                 |                    |       |
| Ln(household flooding losses +1)                                  | 0.10 +       |  | 0.06        | 0.04            | 0.15               | 0.64  |
| Ln(household crop losses +1)                                      | 0.34 *       |  | 0.21 *      | 0.14 +          | 0.11               | 0.51  |
| Specification tests                                               |              |  |             |                 |                    |       |
| Underidentification (Kleibergen-Paap)                             | 11.2 *       |  | 11.4 **     | 11.4 **         | -                  | -     |
| Overidentification (Hansen)                                       | 0.2          |  | 0.8         | 0.1             | -                  | -     |
| Weak identification (Cragg-Donald)                                | 8.5          |  | 8.8         | 8.8             | -                  | -     |

Models also include control variables and indicators for the subdistrict and year.

+ p<0.10, \* p<0.05, \*\* p<0.01, \*\*\* p<0.001

<sup>1</sup> Reference category is "subdistrict low, household no".

<sup>2</sup> Losses measured in '000 taka.

<sup>3</sup> Second stage results from three linear instrumental variables models of mobility, presented as untransformed coefficients. Models for overall, within-district and out-of-district mobility were each estimated separately using the two-step generalized method of moments estimator. N = 26,211

S9. First stage results of the instrumental variables model, Specification H.

| Exogenous variables                                       | Endogenous variables             |                              |       |     |
|-----------------------------------------------------------|----------------------------------|------------------------------|-------|-----|
|                                                           | Ln(household flooding losses +1) | Ln(household crop losses +1) |       |     |
| <b>Individual controls</b>                                |                                  |                              |       |     |
| Female                                                    | -0.01                            | 0.00                         |       |     |
| Age 17-19                                                 | 0.00                             | -0.01                        |       |     |
| Age 20-24                                                 | 0.00                             | 0.01                         |       |     |
| Age 25-29                                                 | 0.01                             | 0.01                         |       |     |
| Age 30-39                                                 | 0.02                             | 0.04                         | +     |     |
| Child of head                                             | -0.02                            | 0.01                         |       |     |
| Primary education                                         | 0.01                             | 0.01                         |       |     |
| Secondary education                                       | -0.01                            | -0.01                        |       |     |
| Has a child                                               | -0.01                            | -0.02                        |       |     |
| <b>Household controls</b>                                 |                                  |                              |       |     |
| Household size                                            | 0.02                             | **                           | 0.01  | +   |
| Proportion of minors                                      | 0.00                             |                              | 0.00  | **  |
| Head is female                                            | -0.06                            |                              | 0.02  |     |
| Head is non-Muslim                                        | -0.06                            |                              | -0.05 |     |
| Head has primary education                                | 0.00                             |                              | -0.06 | **  |
| Head has secondary education                              | 0.07                             | *                            | -0.02 |     |
| Ln(expenditures per capita)                               | 0.03                             |                              | 0.03  |     |
| Ln(land area+1)                                           | 0.01                             |                              | 0.03  | *** |
| Land with irrigation                                      | 0.05                             | +                            | 0.00  |     |
| <b>Village and subdistrict controls</b>                   |                                  |                              |       |     |
| Rich community                                            | -0.11                            | **                           | -0.06 | *   |
| Poor community                                            | 0.00                             |                              | 0.00  |     |
| Jute-producing community                                  | -0.15                            | **                           | -0.07 | +   |
| Community has a road                                      | 0.06                             |                              | 0.04  | +   |
| Community has a school                                    | 0.01                             |                              | 0.04  | +   |
| Subdistrict propensity of local moves                     | 0.00                             |                              | 0.01  | *   |
| Subdistrict propensity of out-migration                   | 0.02                             | **                           | 0.00  |     |
| <b>Instruments</b>                                        |                                  |                              |       |     |
| Annual rainfall/median rainfall, year t                   | -8.31                            | **                           | 2.19  | +   |
| (Annual rainfall/median rainfall) <sup>2</sup> , year t   | 4.04                             | **                           | -1.23 | +   |
| Annual rainfall/median rainfall, year t-1                 | -3.30                            |                              | 2.95  | *   |
| (Annual rainfall/median rainfall) <sup>2</sup> , year t-1 | 1.91                             |                              | -1.34 | *   |
| <b>Measures of model fit</b>                              |                                  |                              |       |     |
| F test of instruments                                     | 3.96                             | **                           | 3.15  | *   |
| R-squared                                                 | 0.031                            |                              | 0.024 |     |

Notes: Models also include indicators for the subdistrict and year. Annual rainfall values were extracted at the subdistrict level from NASA's Prediction of Worldwide Energy Resources dataset (<http://power.larc.nasa.gov/>), which provides global daily precipitation values at 1 degree resolution from a variety of satellite sources. Because the data are restricted to the period 1997-2009, the sample size is restricted to N = 26,211 person-years.



**S10.** Determinants of sample attrition with alternative measures of exposure.

| Predictor                                                                                | Logit         |    | Multinomial logit |                 | Logit                        |             |
|------------------------------------------------------------------------------------------|---------------|----|-------------------|-----------------|------------------------------|-------------|
|                                                                                          | All attrition |    | Household lost    | Individual lost | Individual lost <sup>1</sup> |             |
| <b>Individual-level controls</b>                                                         |               |    |                   |                 |                              |             |
| Female                                                                                   | 1.28          | *  | 1.33              | *               | 1.22                         | 1.22        |
| Age                                                                                      | 0.99          |    | 0.94              | +               | 1.06                         | * 1.06      |
| Age squared                                                                              | 1.00          |    | 1.00              |                 | 1.00                         | * 1.00      |
| Child of head                                                                            | 0.57          | ** | 0.50              | *               | 0.60                         | * 0.61      |
| <b>Household-level controls</b>                                                          |               |    |                   |                 |                              |             |
| Household size                                                                           | 0.88          | ** | 0.77              | *               | 0.92                         | * 0.93      |
| Proportion of minors                                                                     | 1.01          |    | 1.02              | +               | 1.00                         | 1.00        |
| Head is female                                                                           | 1.65          | +  | 1.15              |                 | 2.05                         | * 2.11      |
| Head is non-Muslim                                                                       | 0.71          |    | 0.39              |                 | 0.97                         | 0.92        |
| Head has primary education                                                               | 1.31          |    | 1.33              |                 | 1.24                         | 1.19        |
| Head has secondary education                                                             | 1.19          |    | 0.98              |                 | 1.46                         | 1.43        |
| Ln(expenditures per capita)                                                              | 1.37          |    | 2.08              |                 | 0.84                         | 0.90        |
| Ln(land area+1)                                                                          | 0.79          | ** | 0.61              | **              | 1.08                         | 1.09        |
| Land with irrigation                                                                     | 1.02          |    | 0.99              |                 | 1.26                         | 1.29        |
| <b>Community-level controls</b>                                                          |               |    |                   |                 |                              |             |
| Rich community                                                                           | 1.01          |    | 1.00              |                 | 1.22                         | 1.19        |
| Poor community                                                                           | 0.81          |    | 1.19              |                 | 0.59                         | * 0.58      |
| Jute-producing community                                                                 | 0.94          |    | 2.10              | +               | 0.47                         | * 0.52      |
| <b>Cumulative village shocks</b> (mean annual percent of households exposed in village)  |               |    |                   |                 |                              |             |
| Flooding                                                                                 | 0.90          |    | 0.81              |                 | 0.99                         |             |
| Crop losses                                                                              | 0.93          |    | 0.97              |                 | 0.84                         | +           |
| Livestock deaths                                                                         | 0.85          | *  | 0.74              | +               | 0.91                         |             |
| Health shocks                                                                            | 1.08          |    | 1.12              |                 | 1.06                         |             |
| <b>Cumulative household shocks</b> (number of times household exposed over study period) |               |    |                   |                 |                              |             |
| Flooding                                                                                 |               |    |                   |                 |                              | 0.85        |
| Crop losses                                                                              |               |    |                   |                 |                              | 0.65        |
| Livestock deaths                                                                         |               |    |                   |                 |                              | 0.93        |
| Health shocks                                                                            |               |    |                   |                 |                              | 1.08        |
| <b>Joint test of flooding &amp; crop losses</b>                                          | <b>2.12</b>   |    | <b>4.00</b>       |                 |                              | <b>4.41</b> |
| <b>N (individuals)</b>                                                                   | 6060          |    | 6060              |                 |                              | 5668        |
| <b>Percent lost to follow up</b>                                                         | 6.47          |    | 3.05              |                 | 3.42                         | 3.16        |

Model also includes indicators for subdistrict and year.

+ p<0.10, \* p<0.05, \*\* p<0.01, \*\*\* p<0.001

<sup>1</sup> Conditional on whole household not being lost

Note: Models also include indicators for the subdistrict. Because these models are cross-sectional rather than longitudinal, alternative measures of exposure were developed to identify disaster effects when subdistrict fixed effects are controlled. For the case of households lost to follow up, exposure is measured by the cumulative proportion of households exposed in the village. For the case of individuals lost to follow up (where household data are available), exposure is measured by the cumulative number of times the household was exposed over the study period.
